# Supplementary material for: Development of bishydrazide-based fluorescent probes for the imaging of cellular peroxynitrite (ONOO−) during ferroptosis
Source: Royal Society of Chemistry journal article supplement (doi:10.1039/d4ay00022f), 2024-01-01
Supplement: d4ay00022f1.pdf [file d4ay00022f1.pdf]

## **Development of bishydrazide-based fluorescent probes for the imaging of cellular peroxynitrite (ONOO<sup>-</sup>) during ferroptosis**

Shijing Li,<sup>a</sup> Abdul Hadi Mehmood,<sup>a</sup> Xiaochan Tang,<sup>b</sup> Tao Yue\*<sup>b</sup> and Baoli Dong\*<sup>a</sup>

<sup>a</sup> School of Chemistry and Chemical Engineering, University of Jinan, Jinan, Shandong 250022, People's Republic of China

<sup>b</sup> Shandong Chemical Technology Academy, Qingdao University of Science and Technology (Jinan), Jinan, Shandong, 250014, China

\* Corresponding Author, E-mail address: yuetao@iccas.ac.cn (T. Yue), ifp\_dongbl@ujn.edu.cn (B. Dong).

## Table of Contents

|                                              |        |
|----------------------------------------------|--------|
| 1. Materials and instruments.....            | S3     |
| 2. Preparation method of ONOO- solution..... | S3     |
| 3. Cytotoxicity experiment.....              | S3     |
| 4. Fig. S1-S18.....                          | S4-S12 |

## 1. Materials and instruments

All solvents and reagents were commercially available and used without further purification. Doubly distilled water was used in all the experiments. Thin-layer chromatography (TLC) analysis was performed on silica gel plates and column chromatography was conducted over silica gel (mesh 200-300), both of which were purchased from the Qingdao Ocean Chemicals. Fluorescence spectra and relative fluorescence intensity were measured with a Hitachi F-4600 spectrofluorimeter with a 10 mm quartz cuvette. UV/vis spectra were obtained with a Shimadzu UV-2700 spectrophotometer. High-resolution mass spectra (HRMS) for the characterization of structures were collected using a Bruker apex-Ultra mass spectrometer (Bruker Daltonics Corp., USA) in electrospray ionization (ESI) mode.  $^1\text{H}$  and  $^{13}\text{C}$  NMR spectra were recorded on an AVANCE III 400 MHz Digital NMR Spectrometer, using tetramethylsilane (TMS) as internal reference. LC-MS were collected using an Agilent 6510 Q-TOF LC/MS.

## 2. Preparation method of ONOO<sup>-</sup> solution:

Under the condition of ice bath, HCl solution (0.6 mol/L, 10mL) was added to the mixed solution containing NaNO<sub>2</sub> (0.6 mol/L, 10mL) and H<sub>2</sub>O<sub>2</sub> (0.7 mol/L, 10mL), which was stirred vigorously, followed by NaOH solution (1.5 mol/L, 20mL). Finally, a very small amount of MnO<sub>2</sub> was added and filtered. Note that all the above solutions were prepared from deionized water, and the prepared ONOO<sup>-</sup> must be stored in the dark at -20 ° C.

ONOO<sup>-</sup> Concentration calibration: The UV spectrophotometer was used for testing. Firstly, 2mL of NaOH solution with a concentration of 0.1mol /L was used to sweep the baseline, and then X μL of prepared ONOO<sup>-</sup> solution was added to V mL of NaOH solution with a concentration of 0.1mol /L. The concentration of ONOO<sup>-</sup> solution can be obtained by the following equation. Where  $A_{302\text{nm}}$  is the absorbance of ONOO<sup>-</sup> at 302nm, V is the total volume of solution, and X is the volume of added ONOO<sup>-</sup> solution.

$$c = \frac{A_{302\text{nm}} * V}{1.67X}$$

## 3. Cytotoxicity experiments

HeLa cells were seeded in a 96-well plate at a cell density of 8000 cells/well, cultured for 24 hours, and then replaced with cultures containing different concentrations of **Rh-3** for 24 hours. After that, add 5 mg/mL of MTT solution 10 μL to each well to each well, continue to incubate for 3 h, then add 100 mL of dimethyl sulfoxide (DMSO) to dissolve the precipitate, and measure the absorbance of the resulting solution with a microplate reader.

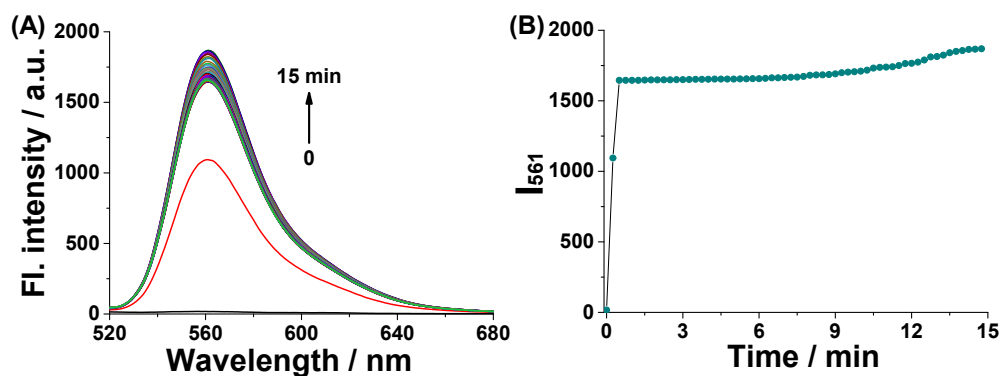

**Fig. S1.** Time-dependent fluorescence spectra (A) and fluorescent intensity ( $I_{561}$ ) (B) of 5  $\mu\text{M}$  Rh-3 in the presence of 20  $\mu\text{M}$  ONOO<sup>-</sup> in PBS (pH = 7.4, 20% DMF).  $\lambda_{\text{ex}}$  = 505 nm

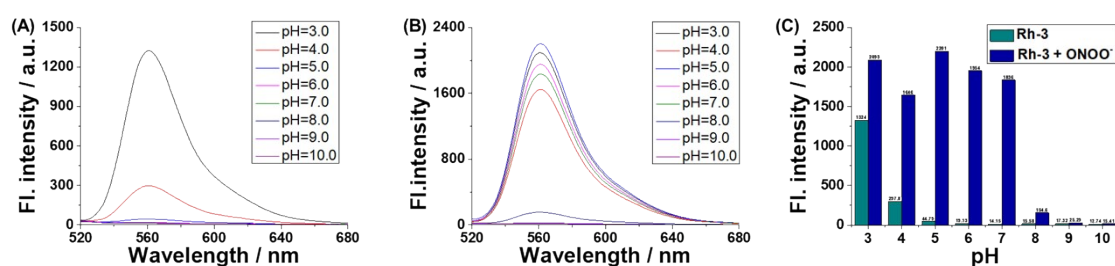

**Fig. S2.** (A) Fluorescence spectra of 5  $\mu\text{M}$  Rh-3 at various pH. (B) Fluorescence spectra of 5  $\mu\text{M}$  Rh-3 treated with 30  $\mu\text{M}$  ONOO<sup>-</sup> at various pH. (C) Quantified fluorescence intensity ( $I_{561}$ ) for (A) and (B).  $\lambda_{\text{ex}}$  = 505 nm.

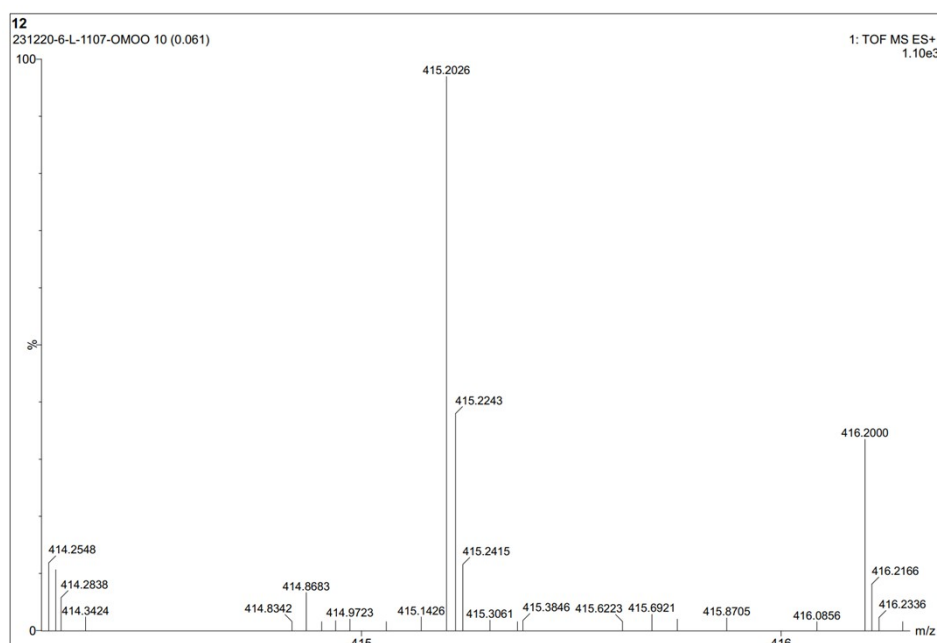

**Fig. S3.** HRMS data of the reaction products of Rh-3 and ONOO<sup>-</sup>.

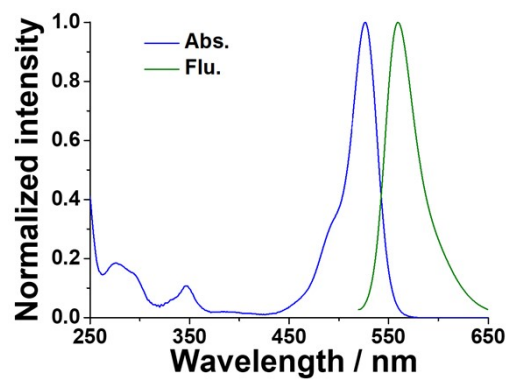

**Fig. S4.** Fluorescence spectra of 5  $\mu\text{M}$  **Rh-3** in 1:1 solution of acetic acid and water.  $\lambda_{\text{ex}} = 450$  nm.

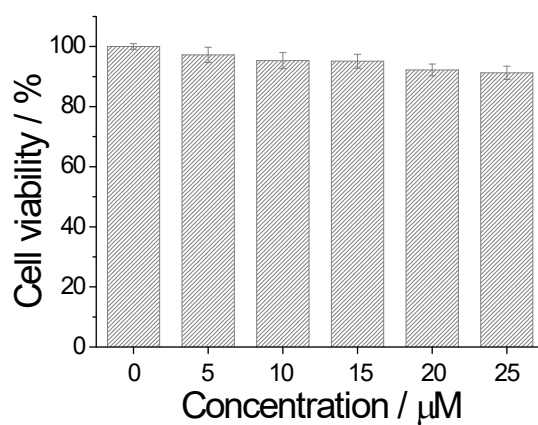

**Fig. S5.** Survival of HeLa cells in the presence of **Rh-3** at various concentrations measured using MTT assay.

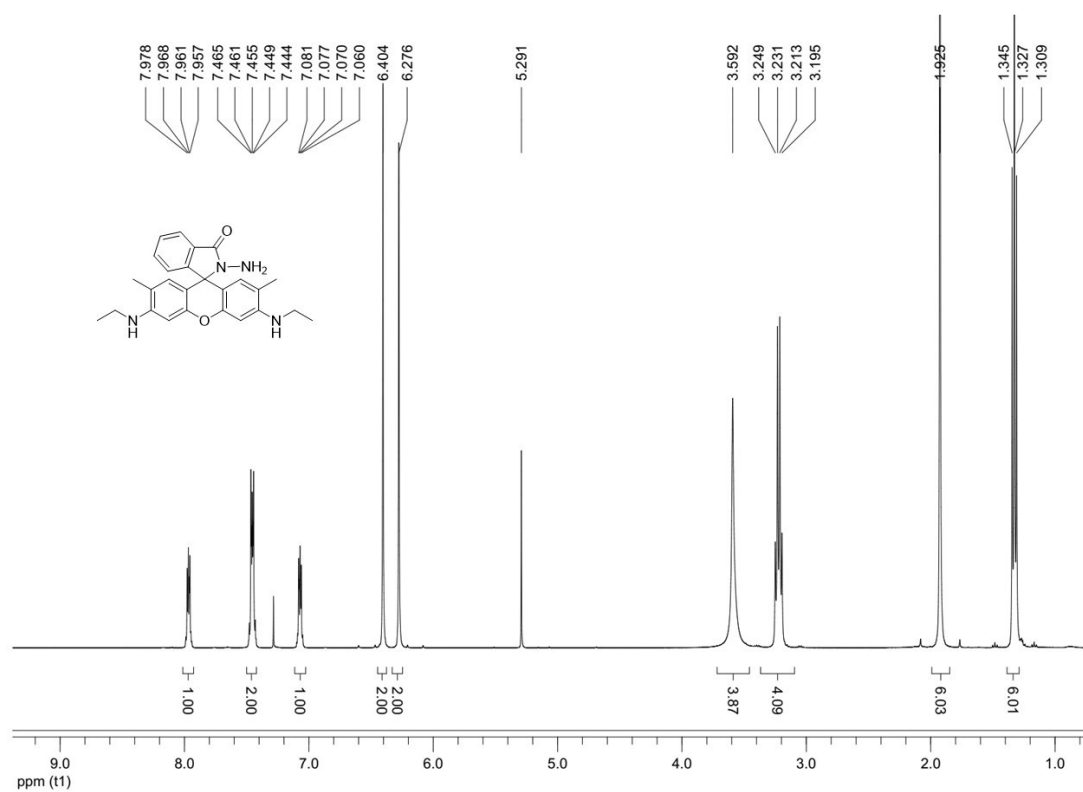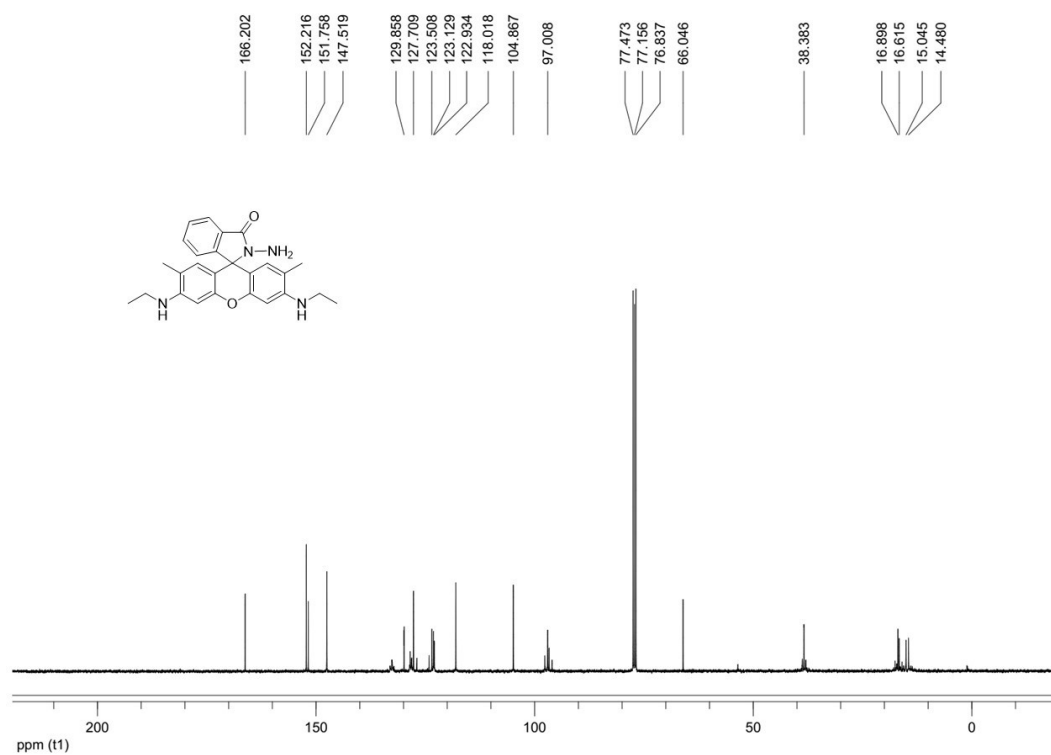

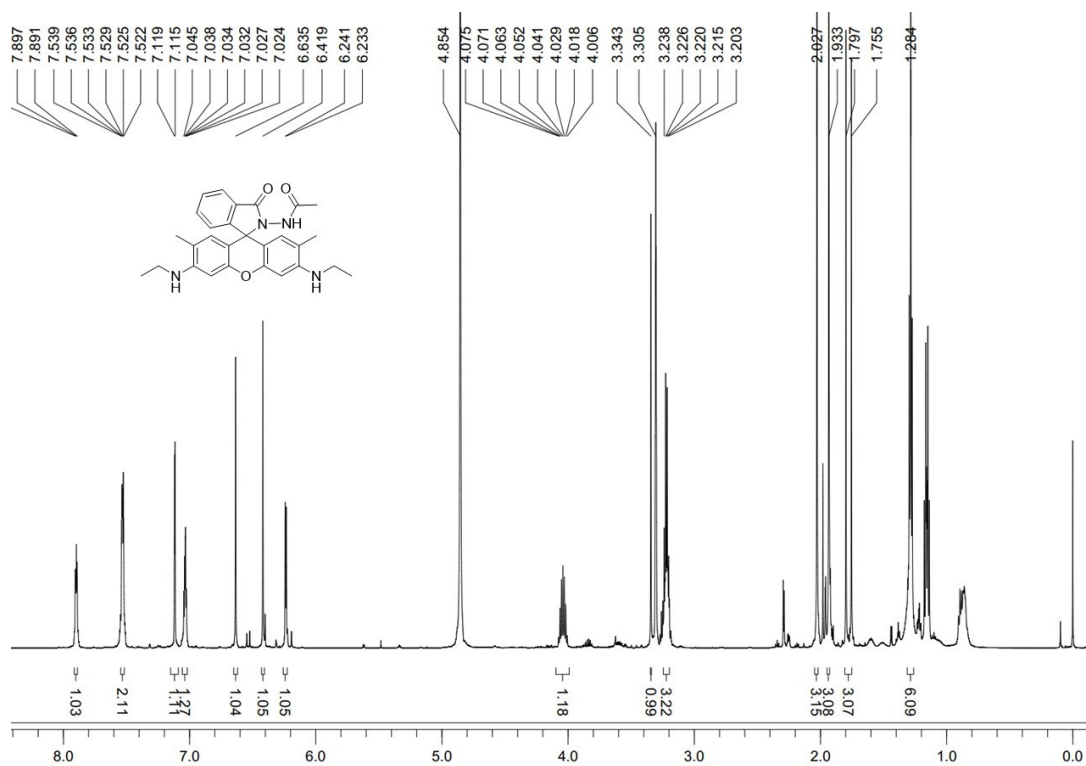

Fig. 8.  $^1\text{H}$  NMR ( $\text{MeOD-}d_4$ ) of Rh-1.

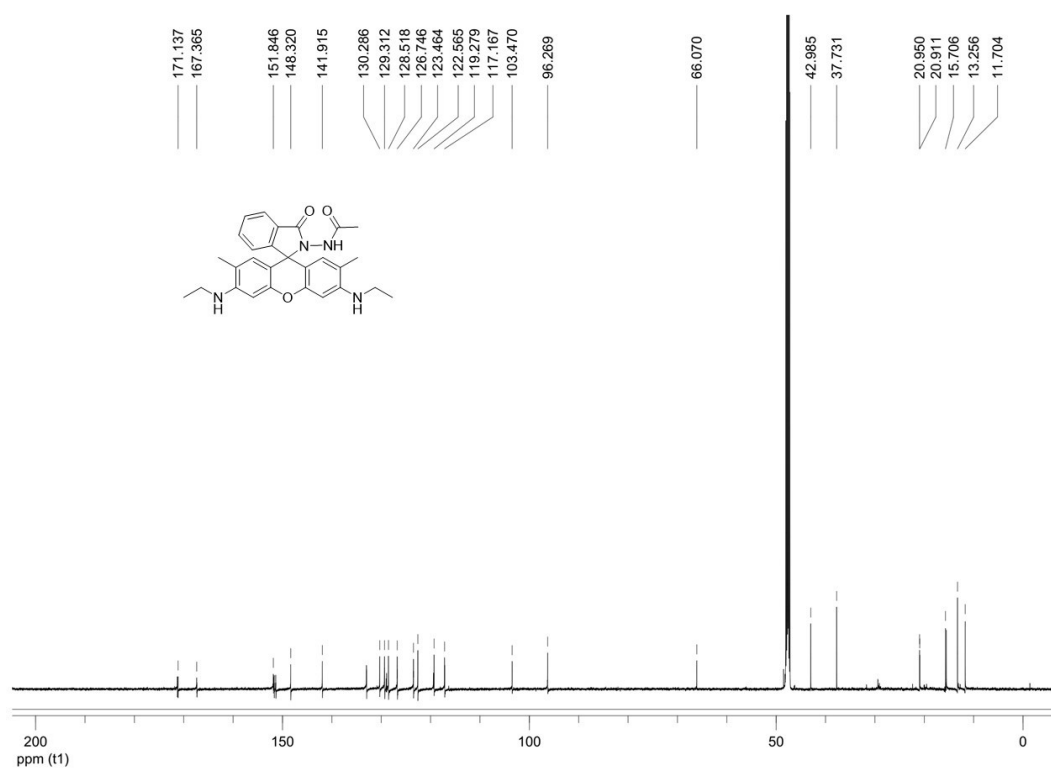

Fig. 9.  $^{13}\text{C}$  NMR ( $\text{MeOD-}d_4$ ) of Rh-1.

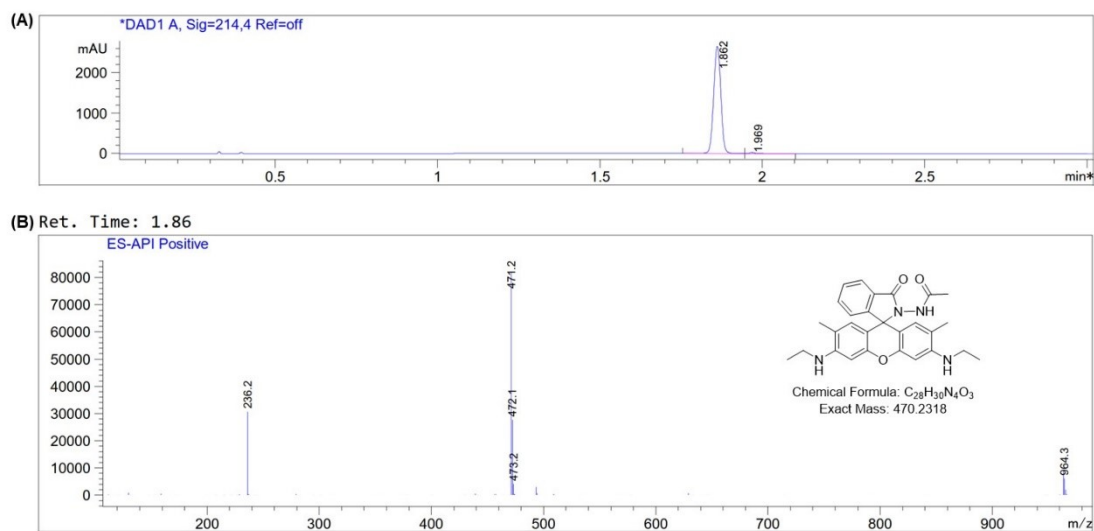

Fig. 10. LC-MS data of Rh-1.

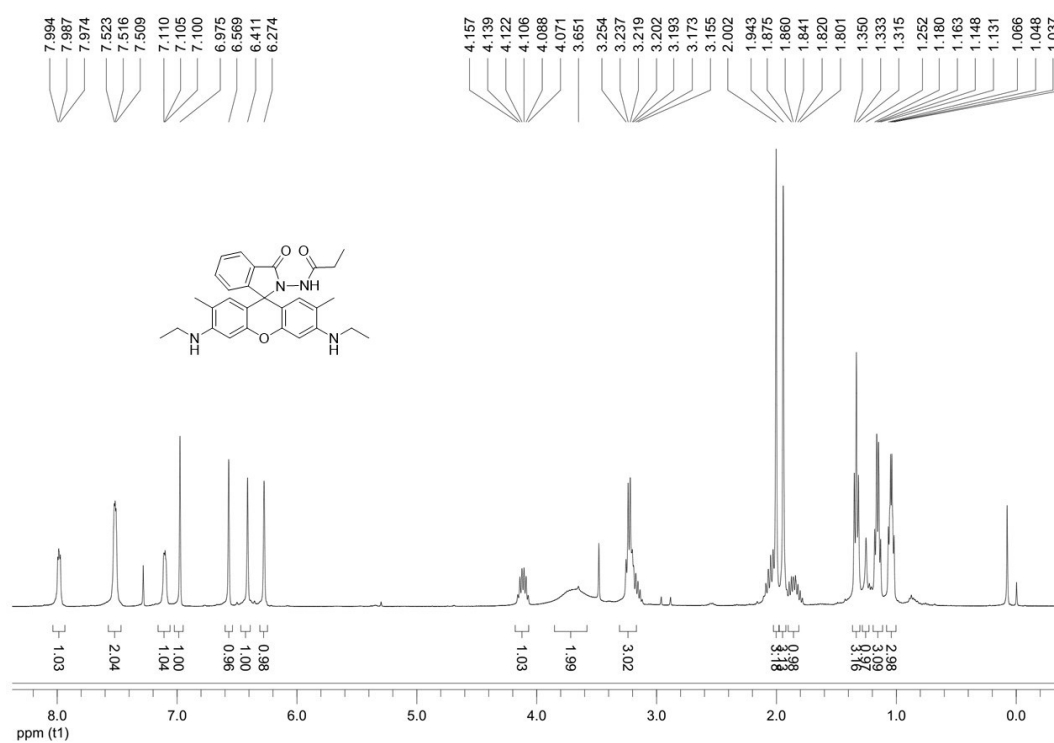

Fig. 11. <sup>1</sup>H NMR (CDCl<sub>3</sub>) of Rh-2.



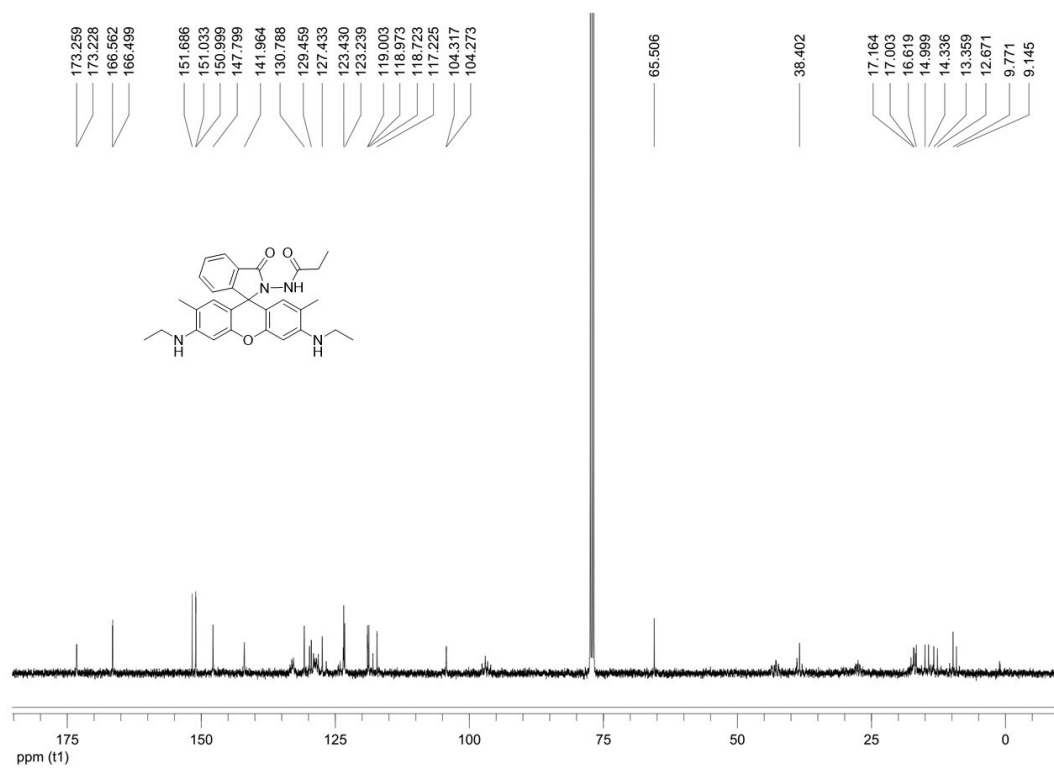

**Fig. 12.**  $^{13}\text{C}$  NMR (CDCl<sub>3</sub>) of Rh-2.

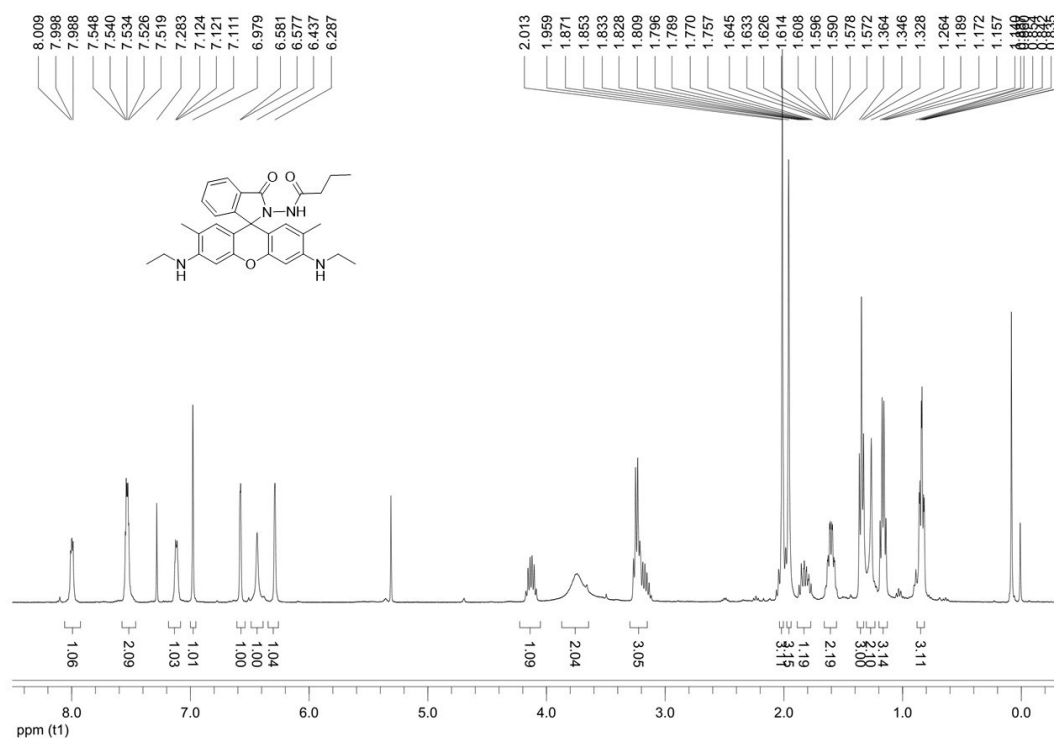

**Fig. 13.**  $^1\text{H}$  NMR (CDCl<sub>3</sub>) of Rh-3.

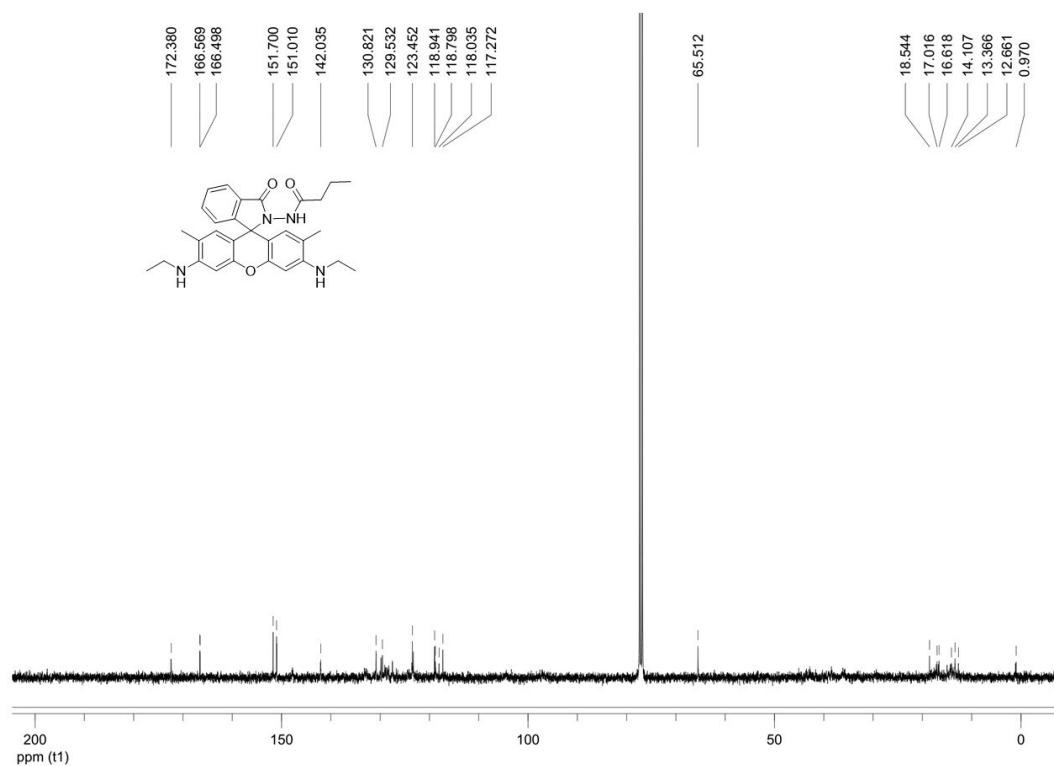

**Fig. 14.**  $^{13}\text{C}$  NMR ( $\text{CDCl}_3$ ) of Rh-3.

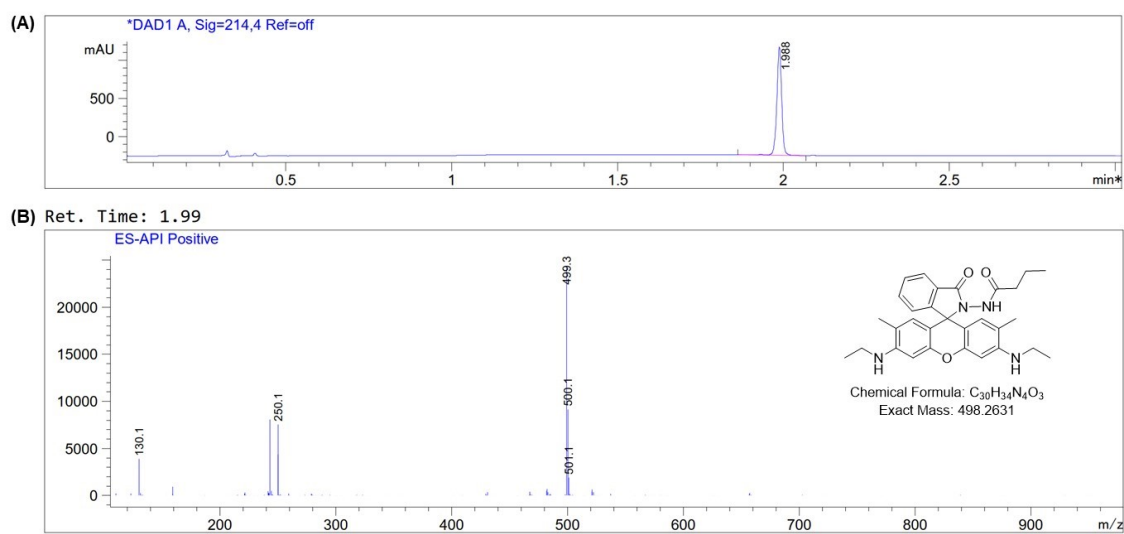

**Fig. 15.** LC-MS data of Rh-3.

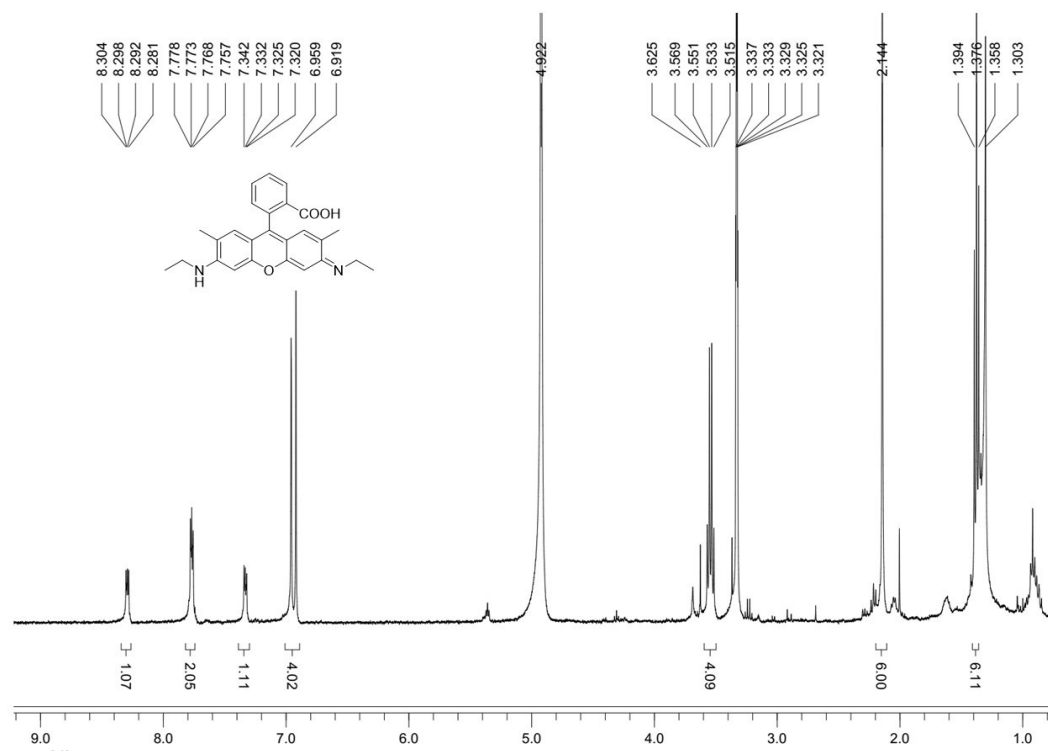

**Fig. 16.**  $^1\text{H NMR}$  (MeOD- $d_4$ ) of Rh-COOH.

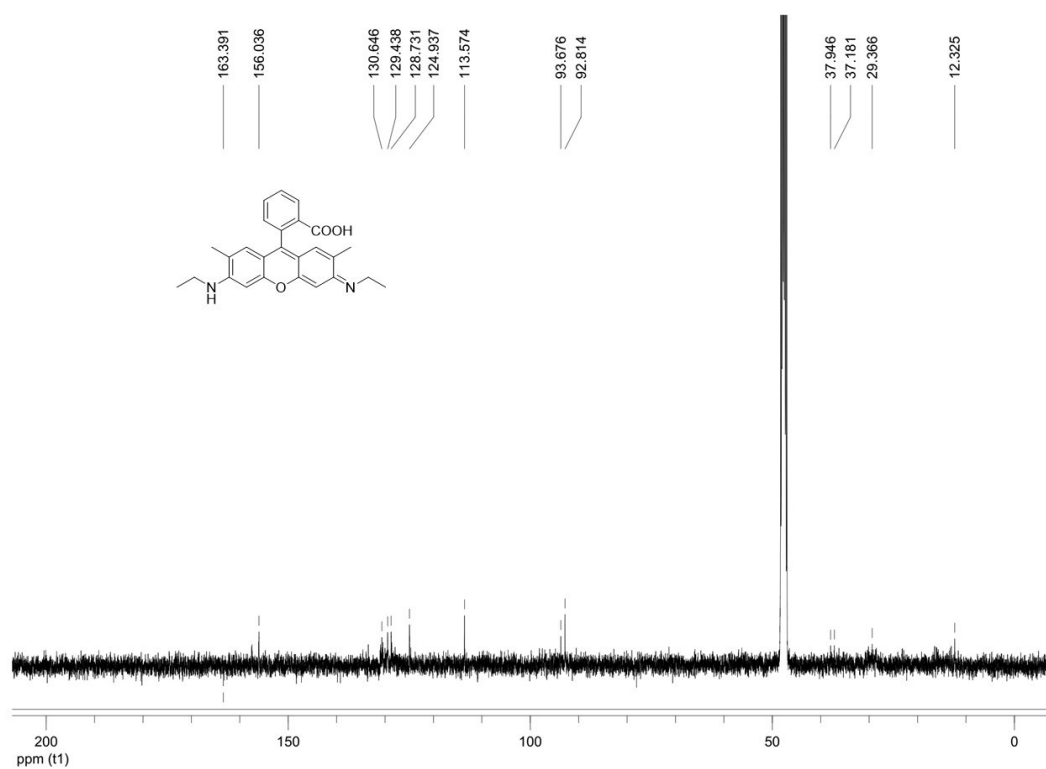

**Fig. 17.**  $^{13}\text{C NMR}$  (MeOD- $d_4$ ) of Rh-COOH.

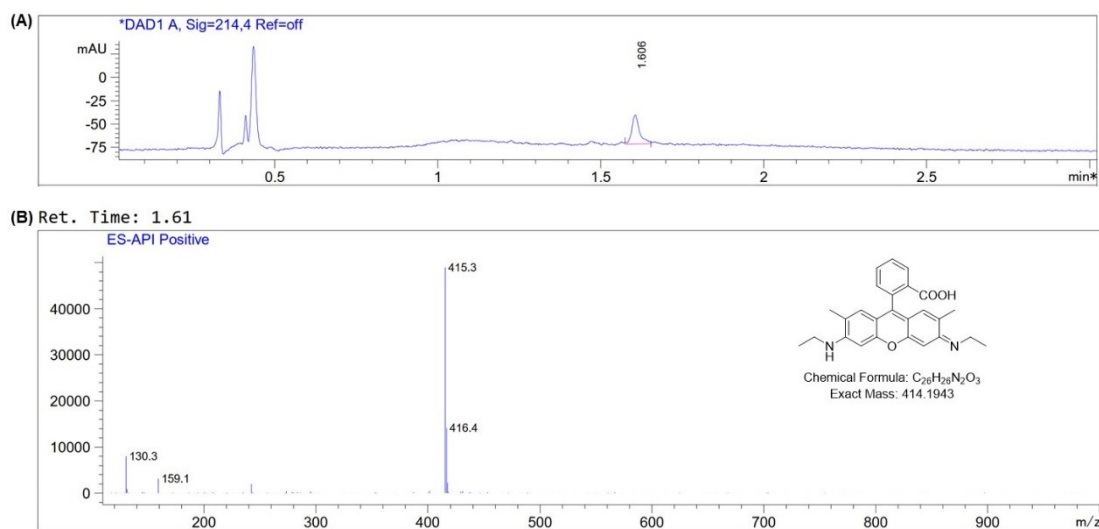

**Fig. 18.** LC-MS data of Rh-COOH.
